# Supplementary material
Source: Royal Society of Chemistry journal article supplement (doi:10.1039/d6ma00143b)
Supplement: d6ma00143b1.pdf [file d6ma00143b1.pdf]

## Supporting Information

# **Ternary Ag·Eu<sub>2</sub>O<sub>3</sub>·SrCO<sub>3</sub> nanomaterials enhanced photocatalytic performance of CV dye and implicated in efficient nitrite sensor development**

Shubrojit Dey <sup>a</sup>, Md Abdus Subhan <sup>a\*</sup>, Umer Shahzad <sup>b</sup>, Mohammad Al-Mamun <sup>c</sup>, Didar Hossain <sup>d</sup>, Maha G. Batterjee <sup>e</sup>, Abul Kalam Azad <sup>d</sup>, O. Madkhali <sup>f</sup>, Khalid A. Alzahrani <sup>b,g</sup>, Mohammed Muzibur Rahman <sup>b,g\*</sup>

<sup>a</sup> *Department of Chemistry, School of Physical Sciences, Shahjalal University of Science and Technology, Sylhet–3114, Bangladesh;*

<sup>b</sup> *Chemistry Department, Faculty of Science, King Abdulaziz University, Jeddah 21589, Saudi Arabia;*

<sup>c</sup> *Centre for Clean Environment and Energy, Griffith School of Environment, Gold Coast Campus, Griffith University, QLD 4222, Australia;*

<sup>d</sup> *Department of Genetic Engineering & Biotechnology, Shahjalal University of Science and Technology, Sylhet–3114, Bangladesh;*

<sup>e</sup> *Department of chemistry, College of Sciences & Arts, King Abdulaziz University, Rabigh, Saudi Arabia;*

<sup>f</sup> *Department of Physical Sciences, Physics Division, College of Science, Jazan University, P.O. Box 2097, 45142 Jazan, Saudi Arabia*

<sup>g</sup> *Center of Excellence for Advanced Materials Research, King Abdulaziz University, Jeddah 21589, Saudi Arabia.*

(\*Corresponding author's e-mail: [subhan-che@sust.edu](mailto:subhan-che@sust.edu) & [mmrahman@kau.edu.sa](mailto:mmrahman@kau.edu.sa) )

## List of Supplemental Figures

**Figure S1.** SEM–EDS mapping of  $\text{Ag}\cdot\text{Eu}_2\text{O}_3\cdot\text{SrCO}_3$  NMs (a) Silver, (b) Europium, (c) Strontium, (d) Oxygen, and (e) is the Overlap of all of them

**Figure S2.** UV–Visible spectra CV dye removal using different amount of  $\text{Ag}\cdot\text{Eu}_2\text{O}_3\cdot\text{SrCO}_3$  NMs (a) 0.05 g, (b) 0.06 g, and (c) 0.07 g

## List of Supplemental Tables

**Table S1.** I and RIR value of components (information were listed from MDI Jade 6.5 software)

**Table S2.** PL excitation and emission data of  $\text{Ag}\cdot\text{Eu}_2\text{O}_3\cdot\text{SrCO}_3$  NMs calcined at 600 °C

**Table S3.** Values of rate constant ( $k$ ) and  $r^2$  for dye removal kinetics

**Table S4.** Percentage of adsorption and adsorption capacity calculation related parameters

**Table S5.** Antibacterial activities of  $\text{Ag}\cdot\text{Eu}_2\text{O}_3\cdot\text{SrCO}_3$  NMs against pathogenic bacteria

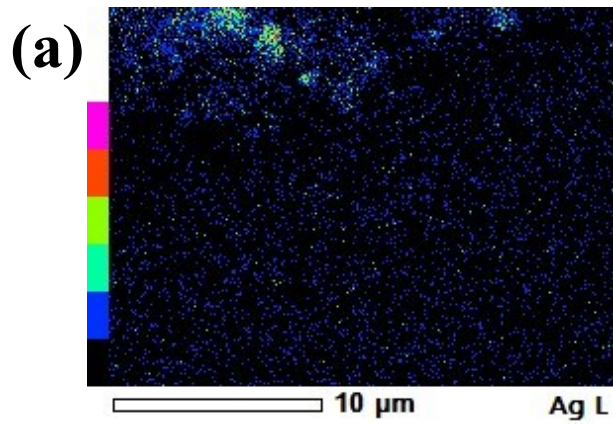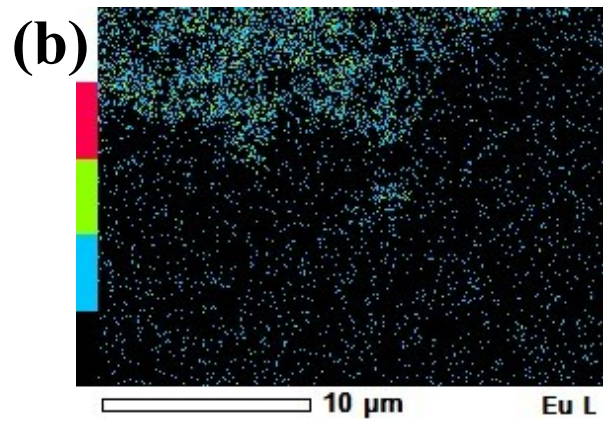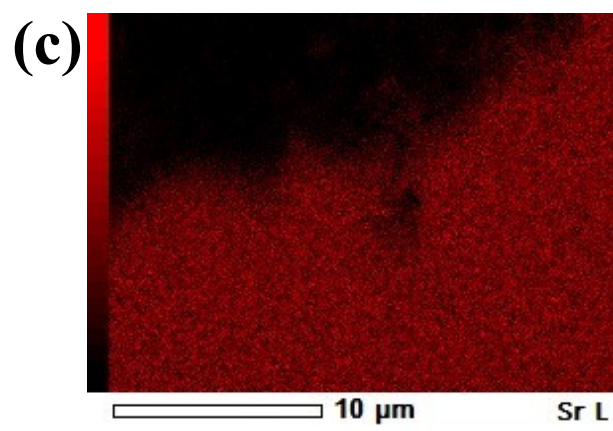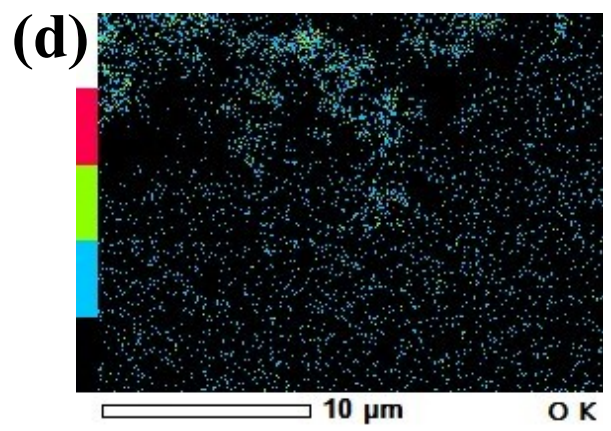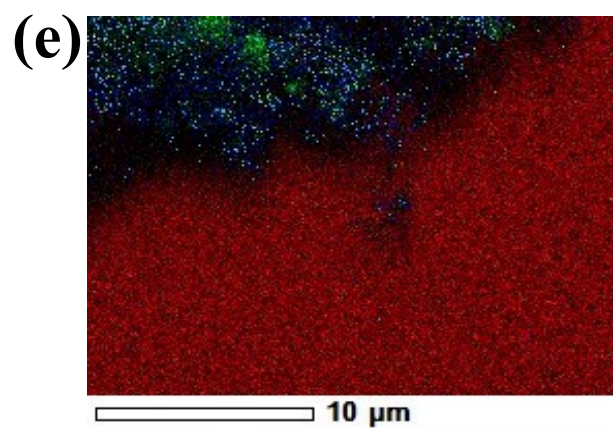

**Figure S1.** SEM–EDS mapping of  $\text{Ag}\cdot\text{Eu}_2\text{O}_3\cdot\text{SrCO}_3$  NMs (a) Silver, (b)Europium, (c) Strontium, (d) Oxygen, and (e) is the Overlap of all of them

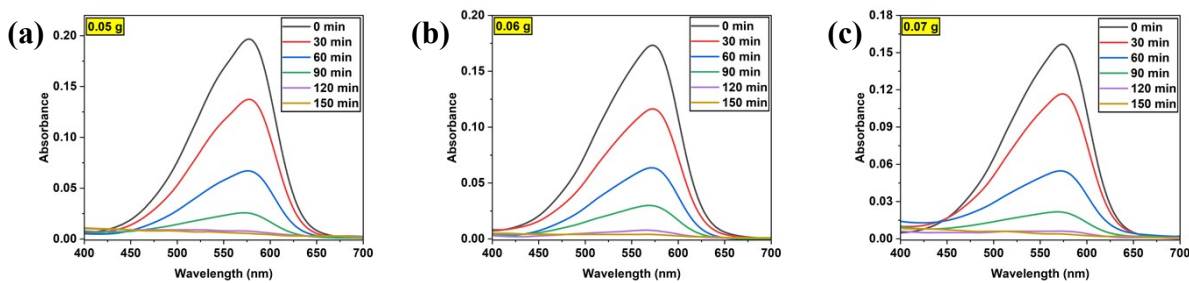

**Figure S2.** UV–Visible spectra CV dye removal using different amount of  $\text{Ag}\cdot\text{Eu}_2\text{O}_3\cdot\text{SrCO}_3$  NMs (a) 0.05 g, (b) 0.06 g, and (c) 0.07 g

**Table S1.** I and RIR value of components (information were listed from MDI Jade 6.5 software)

| <b>Component</b>                   | <b>I value</b> | <b>RIR value</b> |
|------------------------------------|----------------|------------------|
| <b>Ag</b>                          | 12459          | 17.2             |
| <b>Eu<sub>2</sub>O<sub>3</sub></b> | 8042           | 12.05            |
| <b>SrCO<sub>3</sub></b>            | 3821           | 3.84             |

**Table S2.** PL excitation and emission data of Ag·Eu<sub>2</sub>O<sub>3</sub>·SrCO<sub>3</sub> NMs calcined at 600 °C

| <b>Monitored wavelength (nm)</b>  | <b>Excitation wavelength (nm)</b> |
|-----------------------------------|-----------------------------------|
| 450                               | 386                               |
| 500                               | 390                               |
| 550                               | 386, 465                          |
| 600                               | 388, 468                          |
| <b>Excitation wavelength (nm)</b> | <b>Emission wavelength (nm)</b>   |
| 250                               | 386, 471                          |
| 300                               | 403, 462                          |
| 350                               | 399, 426, 460                     |
| 400                               | 473                               |
| 450                               | 509                               |

**Table S3.** Values of rate constant ( $k$ ) and  $r^2$  for dye removal kinetics

| Observation | Rate constant<br>( $k$ , min <sup>-1</sup> ) | $r^2$  | Half-life<br>( $t_{1/2}$ , min) |
|-------------|----------------------------------------------|--------|---------------------------------|
| pH 4        | 0.0068                                       | 0.8444 | 101.911                         |
| pH 7        | 0.0234                                       | 0.772  | 29.615                          |
| pH 9.2      | 0.0267                                       | 0.9648 | 25.955                          |

**Table S4.** Percentage of adsorption and adsorption capacity calculation related parameters

| Adsorbent amount (g) | pH  | Dye initial absorbance ( $A_i$ ) | Dye Initial conc. ( $C_0$ , mg/L) | Dye equilibrium point absorbance ( $A_{eq}$ ) | Dye Equilibrium conc. ( $C_{eq}$ , mg/L) | Adsorption (%) | Adsorption capacity ( $Q_e$ , mg/g) |
|----------------------|-----|----------------------------------|-----------------------------------|-----------------------------------------------|------------------------------------------|----------------|-------------------------------------|
| 0.05                 | 9.2 | 0.201                            | 5                                 | 0.197                                         | 4.826                                    | 1.99           | 34.8                                |
| 0.06                 | 4   |                                  |                                   | 0.223                                         | 5.547                                    | -10.945        | -91.167                             |
|                      | 7   |                                  |                                   | 0.238                                         | 5.92                                     | -18.408        | -153.333                            |
|                      | 9.2 |                                  |                                   | 0.174                                         | 4.328                                    | 13.433         | 112                                 |
| 0.07                 |     |                                  |                                   | 0.157                                         | 3.905                                    | 21.891         | 156.429                             |

**Table S5.** Antibacterial activities of Ag·Eu<sub>2</sub>O<sub>3</sub>·SrCO<sub>3</sub> NMs against pathogenic bacteria

| Bacteria culture              | Diameter of inhibition zone, $D_{iz}$ , (mm) |    |    | Diameter of well, $D_w$ , (mm) | Ratio, $R = D_{iz} / D_w$ |      |      |
|-------------------------------|----------------------------------------------|----|----|--------------------------------|---------------------------|------|------|
|                               | 1                                            | 2  | 3  |                                | 1                         | 2    | 3    |
| <i>Staphylococcus aureus</i>  | 19                                           | 19 | 20 | 6                              | 3.17                      | 3.17 | 3.33 |
| <i>Klebsiella pneumoniae</i>  | 19                                           | 19 | 20 |                                | 3.17                      | 3.17 | 3.33 |
| <i>Pseudomonas aeruginosa</i> | 19                                           | 19 | 19 |                                | 3.17                      | 3.17 | 3.17 |
| <i>Proteus mirabilis</i>      | 18                                           | 19 | 19 |                                | 3                         | 3.17 | 3.17 |
